# Supplementary material for: Silibinin Attenuates Silica Dioxide Nanoparticles-Induced Inflammation by Suppressing TXNIP/MAPKs/AP-1 Signaling
Source: MDPI journal article supplement (doi:10.3390/cells9030678), 2020-03-10
Supplement: s1 [file s1]

## Supplementary Materials

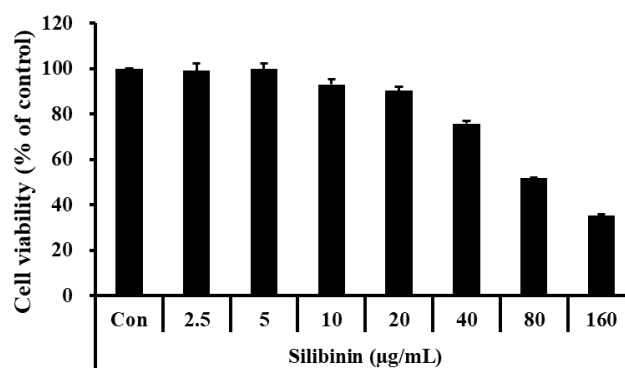

**Supplementary figure 1.** Cell viability in the presence of silibinin in NCI-H292 cells. Cell viability was measure using 3-(4,5-dimethylthiazol-2-yl)-2,5-dihenyltetrazolium bromide (MTT) assay.

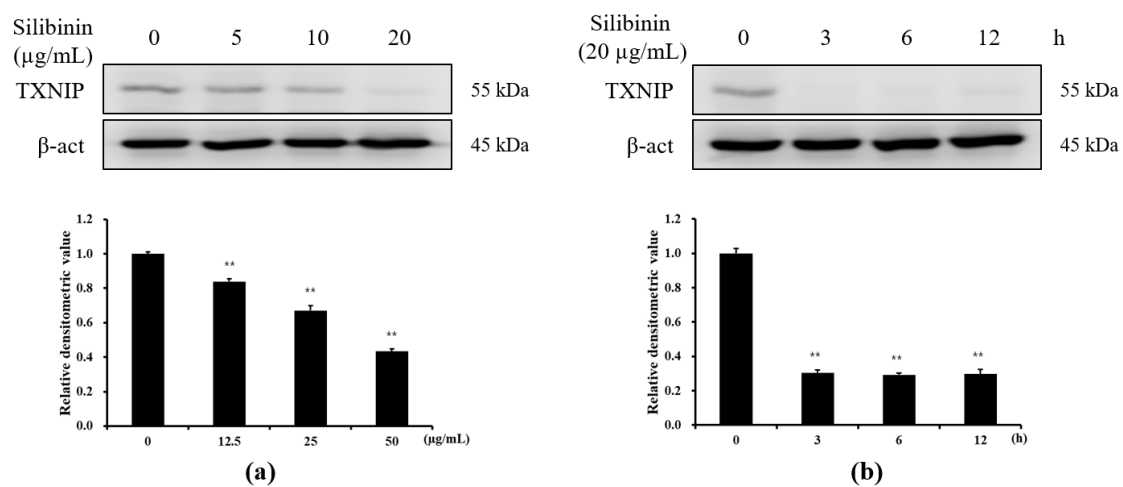

**Supplementary figure 2.** The effects of silibinin on TXNIP expression at the basal condition (a) concentration dependent effect, (b) time dependent effect. \*\*  $P < 0.01$  vs non-treated NCI-H292 cells.

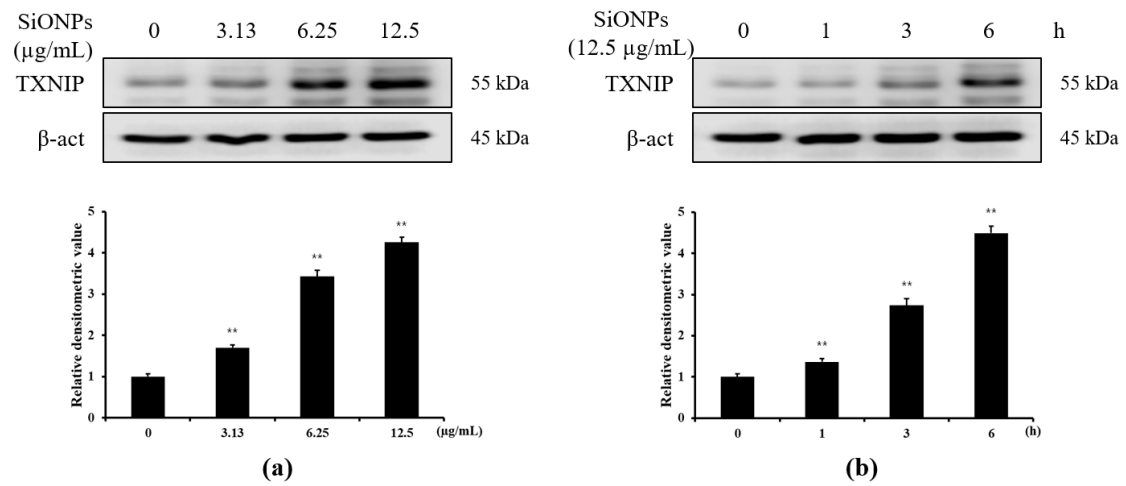

**Supplementary figure 3.** The effects of SiONPs on TXNIP expression at the basal condition (a) concentration dependent effect, (b) time dependent effect. \*\*  $P < 0.01$  vs non-treated NCI-H292 cells.

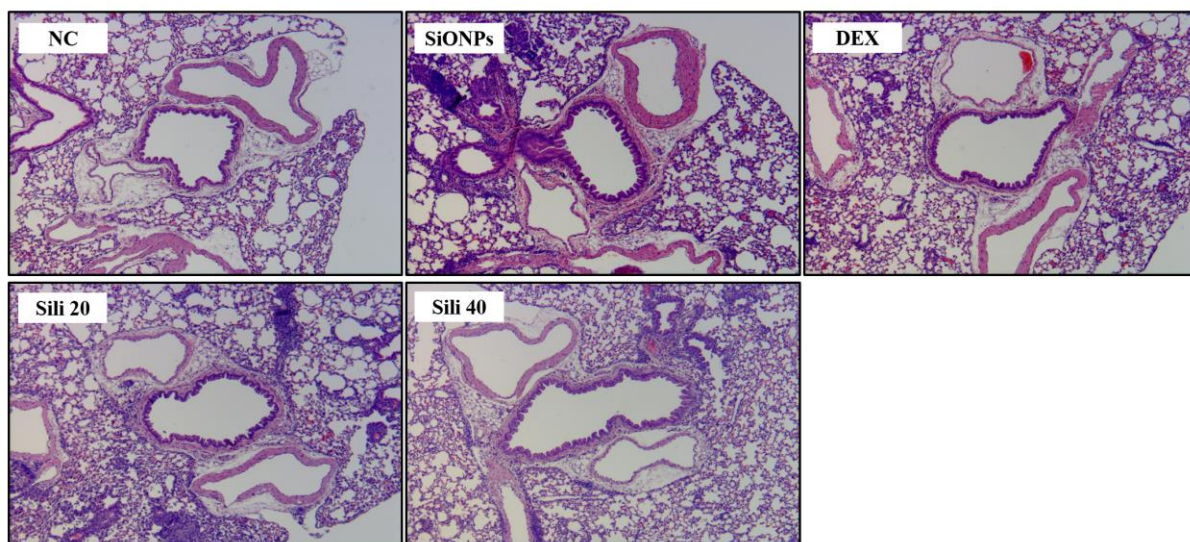

**Supplementary figure 4.** Histopathology for lung tissue (magnification x100).
